# Supplementary material for: Comparison of species-specific qPCR and metabarcoding methods to detect small pelagic fish distribution from open ocean environmental DNA
Source: PubMed Central journal article supplement (PMC9451083; doi:10.1371/journal.pone.0273670), 2022-09-07
Supplement: pone.0273670.s002.pdf [file pone.0273670.s002.pdf]

S1 Fig. The library procedure, thermal cycle settings, and primer sequences of the MiFish method in this study.

**Procedure of library preparation**

1<sup>st</sup> PCR(repeat 4 times)

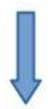

DNA purification

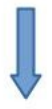

2<sup>nd</sup> PCR

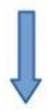

DNA purification

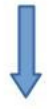

Library preparation finished

| 1 <sup>st</sup> PCR(repeat 4 times)<br>reaction system: |               | Thermal cycles setting: |      | 35 cycles |
|---------------------------------------------------------|---------------|-------------------------|------|-----------|
| 10×Ex Buffer                                            | 1.0μl         | 95°C                    | 3min |           |
| dNTPs(each 2.5mM)                                       | 0.8μl         | 98°C                    | 20s  |           |
| 10μM Forward primer                                     | 0.5μl         | 65°C                    | 15s  |           |
| 10μM Reverse primer                                     | 0.5μl         | 72°C                    | 20s  |           |
| Template DNA(max 2ng/μl)                                | 2.0μl         | 72°C                    | 5min |           |
| ExTaq[TaKaRa](5U/μl)                                    | 0.1μl         |                         |      |           |
| Double distilled water                                  | 5.1μl         |                         |      |           |
| <b>Total</b>                                            | <b>10.0μl</b> |                         |      |           |

| Primer sequence:            |                                                                             |
|-----------------------------|-----------------------------------------------------------------------------|
| primer name                 | Sequence(5'→3')                                                             |
| 1 <sup>st</sup> -MiFish U-F | ACACTCTTTCCTACACGACGCTCTTCCGATC<br>TNNNNNGTCGGTAAAACTCGTGCCAGC              |
| 1 <sup>st</sup> -MiFish E-F | ACACTCTTTCCTACACGACGCTCTTCCGATC<br>TNNNNNGTTGGTAAATCTCGTGCCAGC              |
| 1 <sup>st</sup> -MiFish U-R | GTGACTGGAGTTCAGACGTGTGCTCTTCCGAT<br>CTNNNNNNCATAGTGGGGTATCTAATCCCAGT<br>TTG |
| 1 <sup>st</sup> -MiFish E-R | GTGACTGGAGTTCAGACGTGTGCTCTTCCGAT<br>CTNNNNNNCATAGTGGGGTATCTAATCCCAGT<br>TTG |

| 2 <sup>nd</sup> PCR<br>reaction system:       |               | Thermal cycles setting: |      | 12 cycles |
|-----------------------------------------------|---------------|-------------------------|------|-----------|
| 10×Ex Buffer                                  | 1.0μl         | 94°C                    | 2min |           |
| dNTPs(each 2.5mM)                             | 0.8μl         | 94°C                    | 30s  |           |
| 10μM Forward primer                           | 0.5μl         | 60°C                    | 30s  |           |
| 10μM Reverse primer                           | 0.5μl         | 72°C                    | 30s  |           |
| products from 1 <sup>st</sup> PCR(max 2ng/μl) | 2.0μl         | 72°C                    | 5min |           |
| ExTaq[TaKaRa](5U/μl)                          | 0.1μl         |                         |      |           |
| Double distilled water                        | 5.1μl         |                         |      |           |
| <b>Total</b>                                  | <b>10.0μl</b> |                         |      |           |

| Primer sequence:  |                                                                 |
|-------------------|-----------------------------------------------------------------|
| primer name       | Sequence(5'→3')                                                 |
| 2 <sup>nd</sup> F | AATGATACGGCGACCACCGAGATCTACAC-<br>Index2*-ACACTCTTTCCTACACGACGC |
| 2 <sup>nd</sup> R | CAAGCAGAAGACGGCATACGAGAT-Index1*-<br>GTGACTGGAGTTCAGACGTGTG     |

\*Recorded in S3 Table.
