# Supplementary material for: Comparison of species-specific qPCR and metabarcoding methods to detect small pelagic fish distribution from open ocean environmental DNA
Source: PubMed Central journal article supplement (PMC9451083; doi:10.1371/journal.pone.0273670), 2022-09-07
Supplement: pone.0273670.s003.pdf [file pone.0273670.s003.pdf]

S2 Fig.

(A)

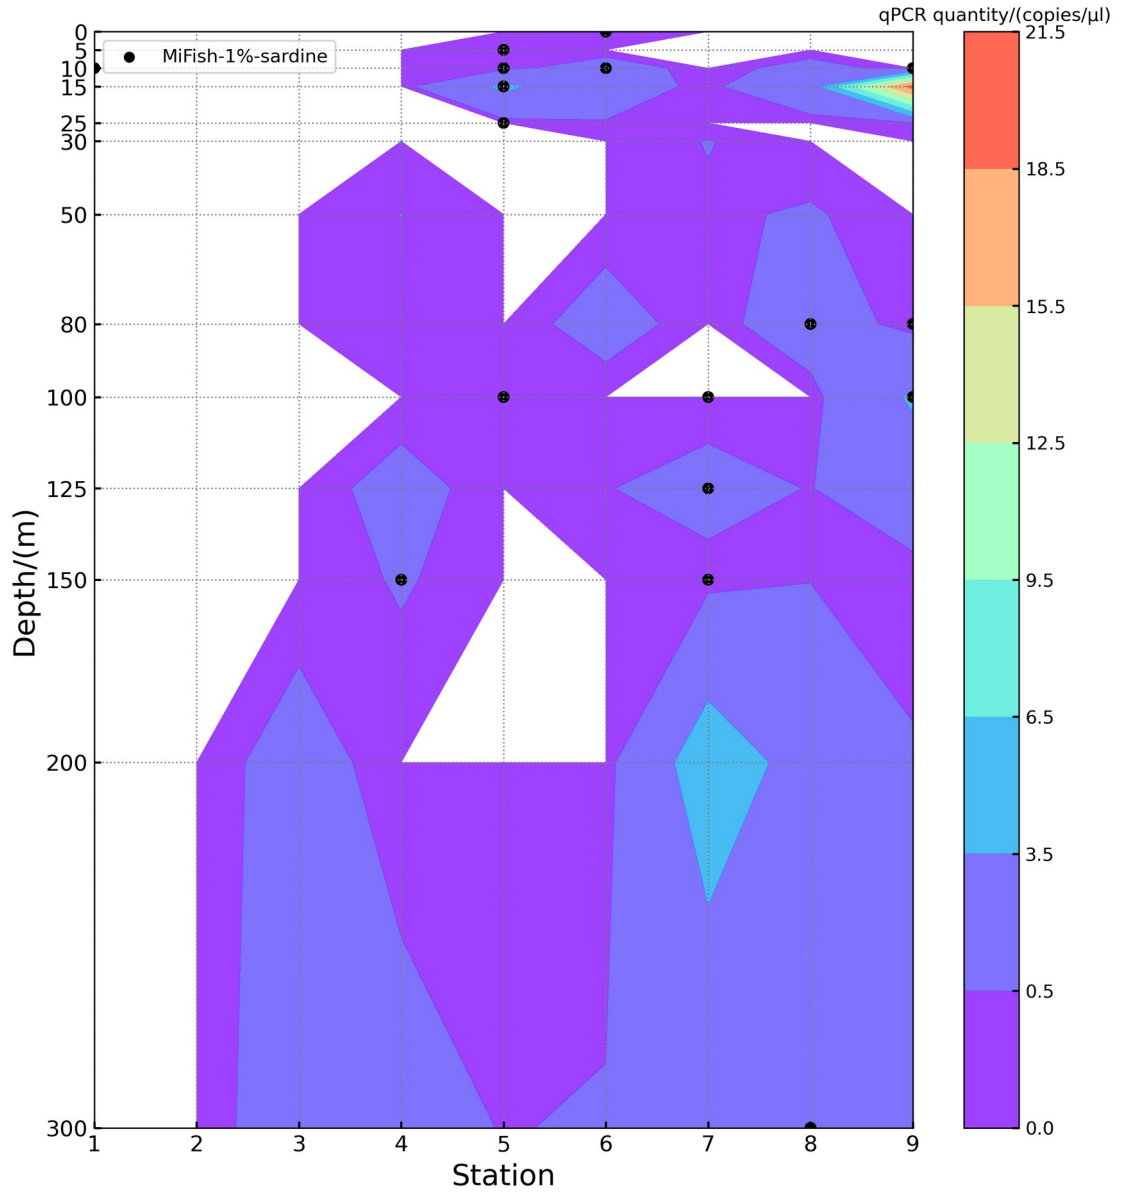

(B)

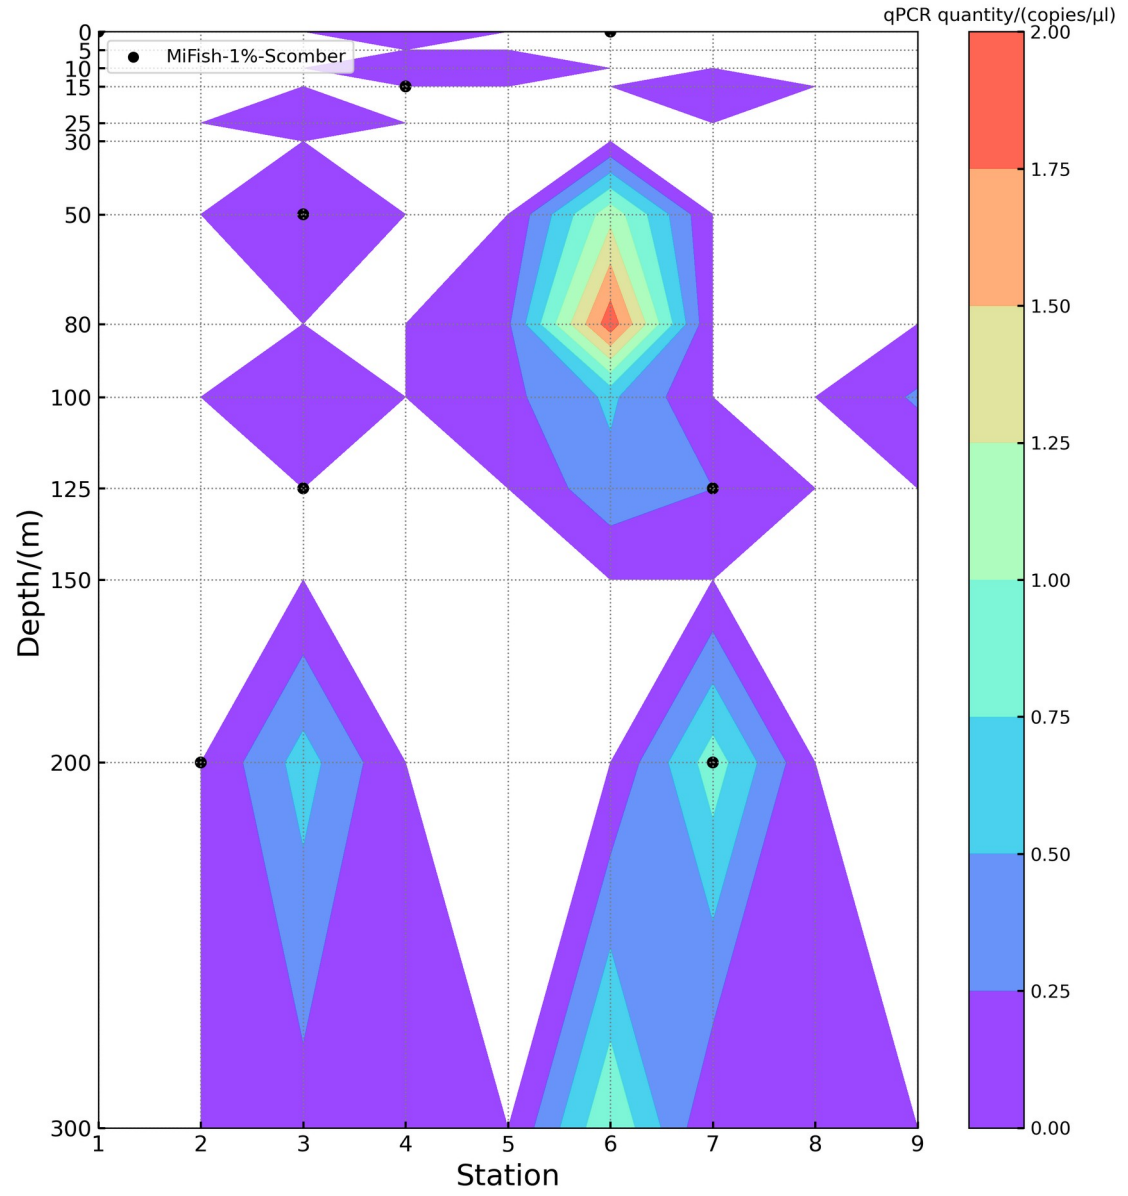

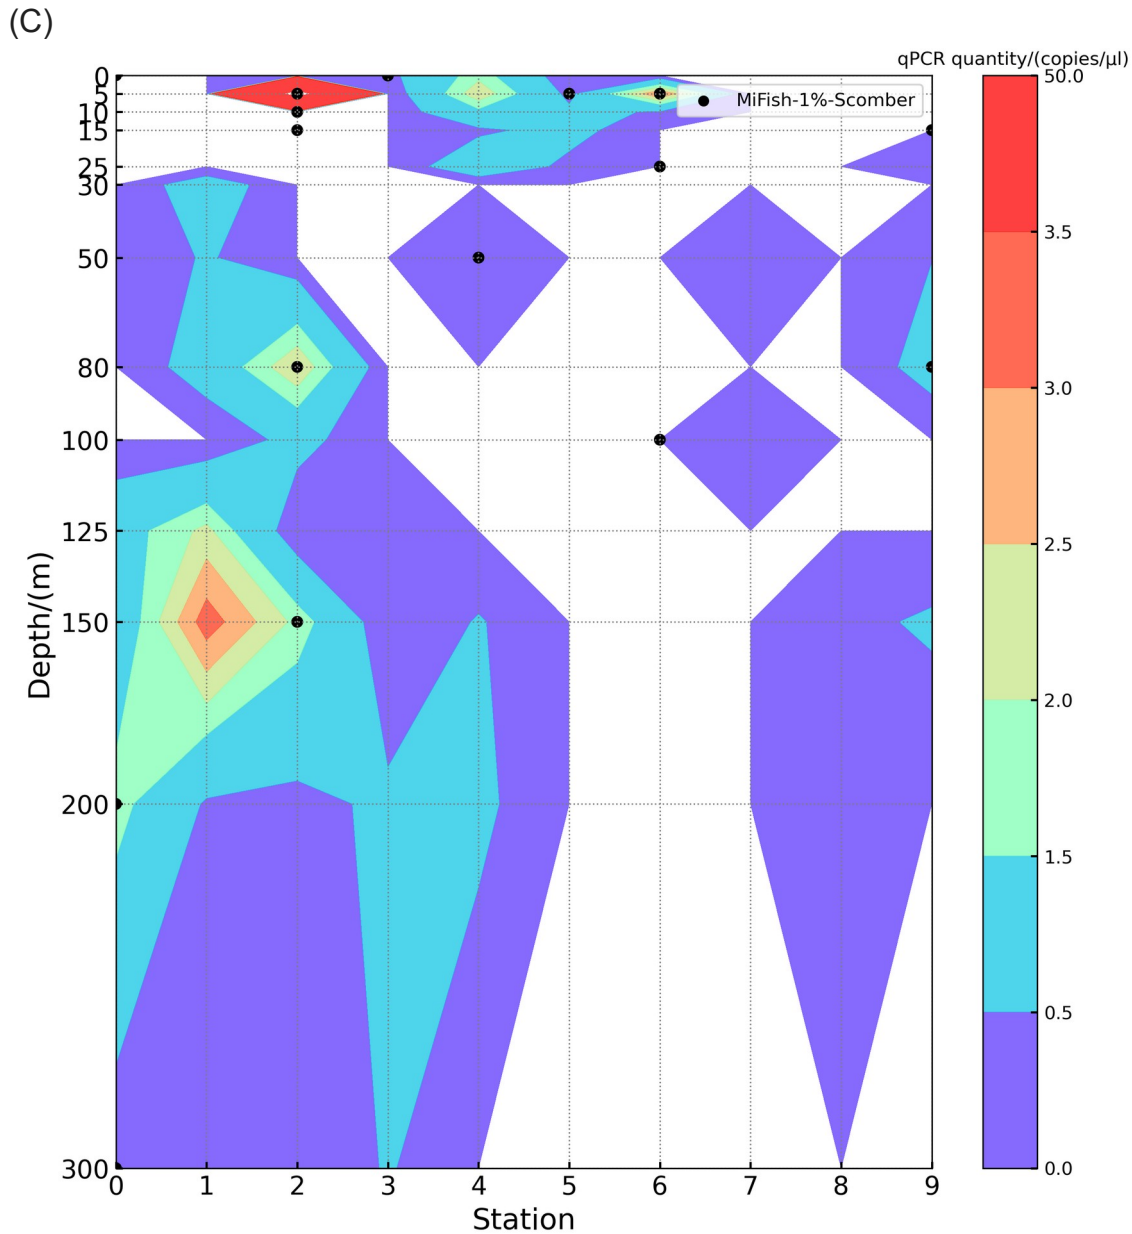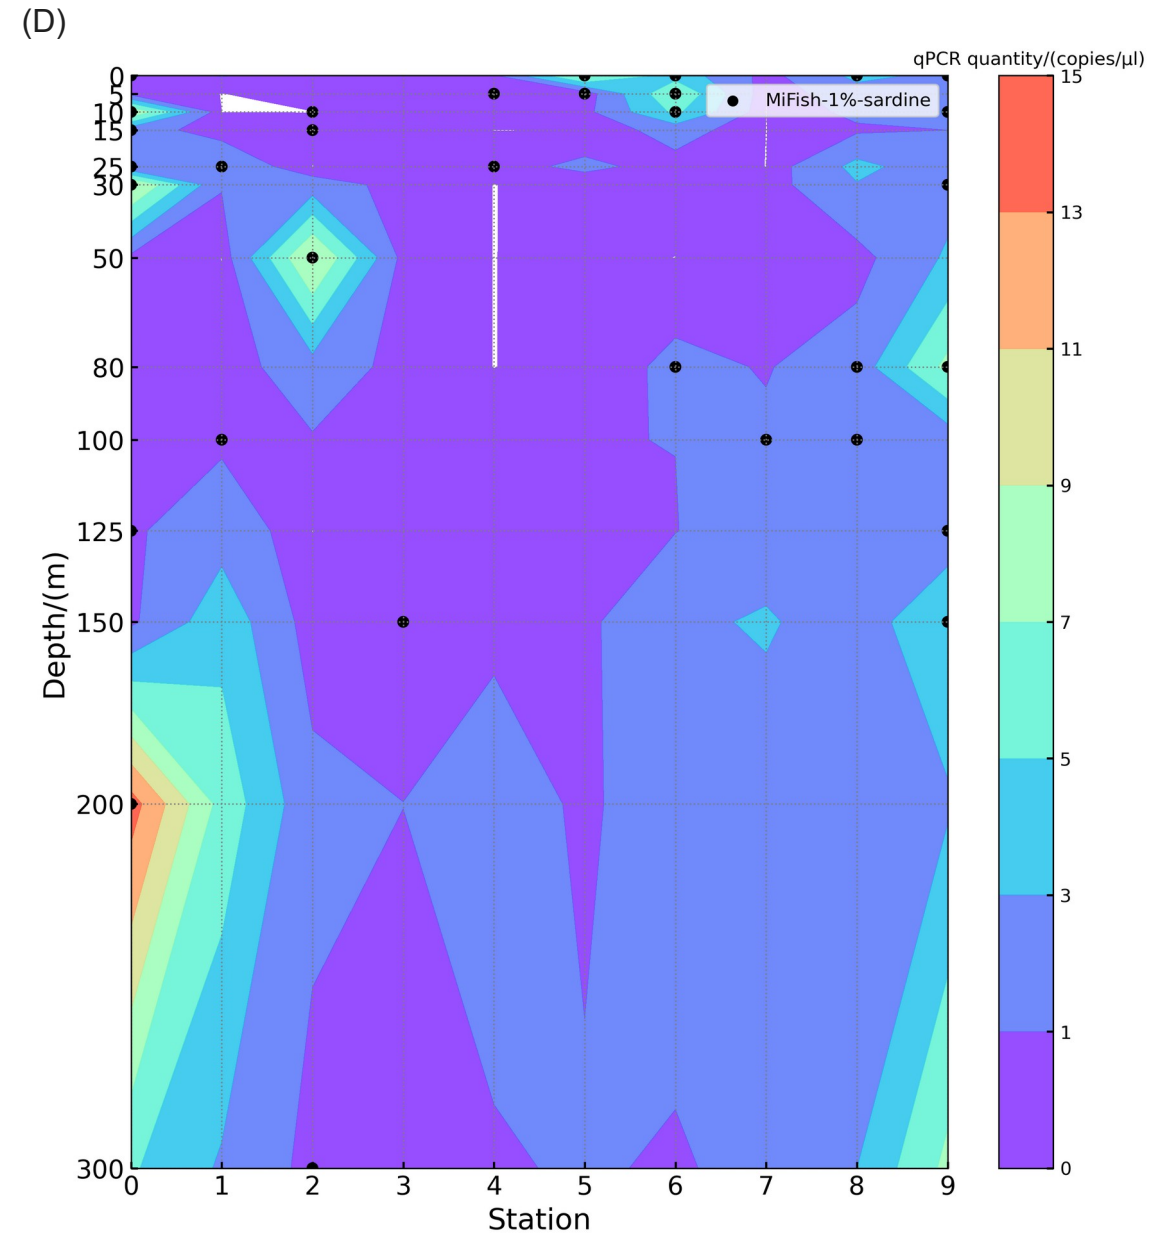

S2 Fig. Comparison between the spatial distribution of presence detection samples found by MiFish and the eDNA quantity obtained from the qPCR results.

A) Results of chub/blue mackerel(*Scomber japonicus* and *Scomber australasicus*), and B) results of sardine(*Sardinops melanostictus*) in the B-line vertical section, C) results of chub/blue mackerel(*Scomber japonicus* and *Scomber australasicus*) and D) results of sardine(*Sardinops melanostictus*) in the C-line vertical section. Filled circles represent the presence detection samples found by the MiFish method. Background colors represent the eDNA quantity from the qPCR method.
