# Supplementary material for: Comparison of species-specific qPCR and metabarcoding methods to detect small pelagic fish distribution from open ocean environmental DNA
Source: PubMed Central journal article supplement (PMC9451083; doi:10.1371/journal.pone.0273670), 2022-09-07
Supplement: pone.0273670.s011.pdf [file pone.0273670.s011.pdf]

S8 Table. Comparison tables for Phi-coefficients analysis of detection performance. 0 = no detection, 1 = positive detection, before and after omitting samples that library preparation was failed.

| original (247 samples)                                    |   |        |     | after omitting (187 samples)                              |   |        |     |
|-----------------------------------------------------------|---|--------|-----|-----------------------------------------------------------|---|--------|-----|
| <i>Scomber australasicus</i> and <i>Scomber japonicus</i> |   |        |     | <i>Scomber australasicus</i> and <i>Scomber japonicus</i> |   |        |     |
|                                                           |   | MiFish |     |                                                           |   | MiFish |     |
|                                                           |   | 1      | 0   |                                                           |   | 1      | 0   |
| qPCR                                                      | 1 | 12     | 51  | qPCR                                                      | 1 | 12     | 45  |
|                                                           | 0 | 11     | 173 |                                                           | 0 | 11     | 116 |
| <i>Engraulis japonicus</i>                                |   |        |     | <i>Engraulis japonicus</i>                                |   |        |     |
|                                                           |   | MiFish |     |                                                           |   | MiFish |     |
|                                                           |   | 1      | 0   |                                                           |   | 1      | 0   |
| qPCR                                                      | 1 | 1      | 15  | qPCR                                                      | 1 | 1      | 13  |
|                                                           | 0 | 3      | 228 |                                                           | 0 | 3      | 167 |
| <i>Sardinops melanostictus</i>                            |   |        |     | <i>Sardinops melanostictus</i>                            |   |        |     |
|                                                           |   | MiFish |     |                                                           |   | MiFish |     |
|                                                           |   | 1      | 0   |                                                           |   | 1      | 0   |
| qPCR                                                      | 1 | 43     | 111 | qPCR                                                      | 1 | 43     | 88  |
|                                                           | 0 | 6      | 87  |                                                           | 0 | 6      | 47  |
| <i>Cololabis saira</i>                                    |   |        |     | <i>Cololabis saira</i>                                    |   |        |     |
|                                                           |   | MiFish |     |                                                           |   | MiFish |     |
|                                                           |   | 1      | 0   |                                                           |   | 1      | 0   |
| qPCR                                                      | 1 | 1      | 1   | qPCR                                                      | 1 | 1      | 0   |
|                                                           | 0 | 6      | 239 |                                                           | 0 | 6      | 177 |
| <i>Trachurus japonicus</i>                                |   |        |     | <i>Trachurus japonicus</i>                                |   |        |     |
|                                                           |   | MiFish |     |                                                           |   | MiFish |     |
|                                                           |   | 1      | 0   |                                                           |   | 1      | 0   |
| qPCR                                                      | 1 | 0      | 1   | qPCR                                                      | 1 | 0      | 1   |
|                                                           | 0 | 0      | 246 |                                                           | 0 | 0      | 186 |
